# Supplementary material for: Tissue‐resident MAIT cell populations in human oral mucosa exhibit an activated profile and produce IL‐17
Source: PubMed Central journal article supplement — Eur J Immunol. 2018 Nov 14;49(1):133–43. doi: 10.1002/eji.201847759 (PMC6519349; doi:10.1002/eji.201847759), 2018-11-14
Supplement: EJI-49-133-s001.pdf [file EJI-49-133-s001.pdf]

# European Journal of Immunology

**Supporting Information**

**for**

**DOI 10.1002/eji.201847759**

Michał J. Sobkowiak, Haleh Davanian, Robert Heymann, Anna Gibbs,  
Johanna Emgård, Joana Dias, Soo Aleman, Carina Krüger-Weiner, Markus Moll,  
Annelie Tjernlund, Edwin Leeansyah, Margaret Sällberg Chen  
and Johan K. Sandberg

**Tissue-resident MAIT cell populations in human oral mucosa exhibit an activated  
profile and produce IL-17**

## Supporting Information Tables

Supporting Information Table 1. Healthy donor demographics.

|                        | Men                 | Women               | Combined            |
|------------------------|---------------------|---------------------|---------------------|
| Number                 | 30 (45.5%)          | 36 (54.5%)          | 66 (100%)           |
| Median age ( $\pm$ SD) | 29 ( $\pm$ 7.8)     | 30 ( $\pm$ 8.4)     | 29 ( $\pm$ 8.1)     |
| Median BMI ( $\pm$ SD) | 24.09 ( $\pm$ 3.18) | 21.74 ( $\pm$ 2.87) | 22.67 ( $\pm$ 3.14) |

Supporting Information Table 2. Statistical significance obtained using Wilcoxon matched-pairs statistical test for data presented in Figure 5E. *p*-values lower than 0.05 are highlighted.

| TNF | IFN $\gamma$ | IL-2 | IL-17 | GrzB | CD103-/blood | CD103+/blood | CD103-/+     |
|-----|--------------|------|-------|------|--------------|--------------|--------------|
| +   | +            | +    | +     | +    | 0.262        | 0.262        | 0.936        |
| +   | +            | +    | +     | -    | 0.423        | 0.936        | 0.522        |
| +   | +            | +    | -     | +    | <b>0.025</b> | 0.055        | 0.936        |
| +   | +            | +    | -     | -    | <b>0.037</b> | <b>0.025</b> | 0.055        |
| +   | +            | -    | +     | +    | <b>0.016</b> | <b>0.016</b> | 1.000        |
| +   | +            | -    | +     | -    | 0.055        | 0.055        | 0.936        |
| +   | +            | -    | -     | +    | <b>0.037</b> | <b>0.025</b> | 1.000        |
| +   | +            | -    | -     | -    | <b>0.006</b> | <b>0.004</b> | <b>0.037</b> |
| +   | -            | +    | +     | +    | 0.262        | 0.749        | 0.522        |
| +   | -            | +    | +     | -    | 0.522        | 0.337        | 0.423        |
| +   | -            | +    | -     | +    | 0.055        | 0.337        | 0.631        |
| +   | -            | +    | -     | -    | 0.423        | 0.873        | 0.423        |
| +   | -            | -    | +     | +    | 0.128        | 0.128        | 0.936        |
| +   | -            | -    | +     | -    | <b>0.004</b> | <b>0.045</b> | 0.109        |
| +   | -            | -    | -     | +    | 0.522        | 0.522        | 0.689        |
| +   | -            | -    | -     | -    | 0.631        | 0.150        | 0.078        |
| -   | +            | +    | +     | +    | 1.000        | 0.631        | 0.631        |
| -   | +            | +    | +     | -    | 0.749        | 0.749        | 0.522        |
| -   | +            | +    | -     | +    | 0.150        | 0.471        | 0.631        |
| -   | +            | +    | -     | -    | <b>0.004</b> | 0.423        | 0.150        |
| -   | +            | -    | +     | +    | 0.631        | 0.631        | 1.000        |
| -   | +            | -    | +     | -    | 0.150        | 0.471        | 0.150        |
| -   | +            | -    | -     | +    | 0.631        | 0.150        | 0.522        |
| -   | +            | -    | -     | -    | 0.873        | 0.109        | 0.200        |

|   |   |   |   |   |       |              |       |
|---|---|---|---|---|-------|--------------|-------|
| - | - | + | + | + | 0.936 | 0.936        | 0.936 |
| - | - | + | + | - | 0.200 | 0.200        | 0.873 |
| - | - | + | - | + | 0.150 | 0.471        | 0.631 |
| - | - | + | - | - | 0.262 | 0.522        | 0.078 |
| - | - | - | + | + | 0.631 | 0.936        | 0.631 |
| - | - | - | + | - | 0.200 | <b>0.016</b> | 0.078 |
| - | - | - | - | + | 0.337 | 0.749        | 0.749 |

**Supporting Information Table 3.** Antibodies used for *in situ* microscopic analysis

| Target            | Clone      | Conjugate       | Supplier                    |
|-------------------|------------|-----------------|-----------------------------|
| V $\alpha$ 7.2    | 3C10       | Unconjugated    | BioLegend                   |
| IL-18 R $\alpha$  | AF840      | Unconjugated    | R&D Systems                 |
| MR1               | 8F2.F9     | Unconjugated    | Obtained from Dr Ted Hansen |
| HLA-DR            | L243       | Biotinylated    | BD Biosciences              |
| CD3               | SP7        | Unconjugated    | Abcam                       |
| Donkey anti-mouse | Polyclonal | Alexa fluor 594 | Life Technologies           |
| Rabbit anti-goat  | Polyclonal | Biotin          | Beckman Coulter             |
| Streptavidin      | N/A        | Alexa fluor 488 | Life Technologies           |

**Supporting Information Table 4.** Monoclonal antibodies used for flow cytometry.

| Target       | Clone    | Conjugate                 | Supplier        |
|--------------|----------|---------------------------|-----------------|
| CD3          | OKT3     | Brilliant violet 650      | BioLegend       |
| CD3          | OKT3     | Brilliant violet 785      | BioLegend       |
| CD4          | RPA-T4   | FITC                      | BioLegend       |
| CD4          | OKT4     | Brilliant violet 711      | BioLegend       |
| CD8 $\alpha$ | RPA-T8   | Brilliant violet 570      | BioLegend       |
| CD8 $\beta$  | SIDI8BEE | PE-Cy7                    | eBioscience     |
| CD38         | HIT2     | Brilliant violet 711      | BioLegend       |
| CD45         | HI30     | Alexa fluor 700           | BioLegend       |
| CD69         | TP1.55.3 | ECD                       | Beckman Coulter |
| CD103        | Ber-ACT8 | Brilliant ultraviolet 395 | BD Horizon      |
| CD161        | HP-3G10  | Brilliant violet 605      | BioLegend       |

|                |          |                      |               |
|----------------|----------|----------------------|---------------|
| CD161          | DX12     | PE-Cy5               | BD Pharmingen |
| CD279 (PD-1)   | EH12.2H7 | Brilliant violet 785 | BioLegend     |
| Granulysin     | DH2      | PE                   | BioLegend     |
| Granzyme B     | GB11     | FITC                 | BioLegend     |
| HLA-DR         | L243     | Brilliant violet 650 | BioLegend     |
| IFN $\gamma$   | 4S.B3    | Brilliant violet 785 | BioLegend     |
| IL-17A         | BL168    | Brilliant violet 421 | BioLegend     |
| Perforin       | B-D48    | Brilliant violet 421 | BioLegend     |
| PLZF           | 6318100  | APC                  | R&D Systems   |
| V $\alpha$ 7.2 | 3C10     | Brilliant violet 510 | BioLegend     |
| V $\alpha$ 7.2 | 3C10     | PE                   | BioLegend     |
| TNF            | MAb11    | PE-Cy7               | BD Pharmingen |

**Supporting Information Table S5.** Primer sequences and annealing temperatures.

| <b>Primer</b>                | <b>Sequence</b>                                           | <b>Annealing temperature (°C)</b> |
|------------------------------|-----------------------------------------------------------|-----------------------------------|
| V $\alpha$ 7.2-J $\alpha$ 33 | Fow: 5TCCTTAGTCGGTCTAAAGGGTACAG<br>Rev: CCAGCGCCCCAGATTAA | 58                                |
| V $\alpha$ 7.2-J $\alpha$ 20 | Fow: AGTCGGTCTAAAGGGTACAGTT<br>Rev: CAGTTACTGTGGTTCCGGCT  | 60                                |
| V $\alpha$ 7.2-J $\alpha$ 12 | Fow: AGTCGGTCTAAAGGGTACAGTT<br>Rev: GGTCCCCTCCCGAAGAT     | 58                                |
| C $\alpha$                   | Fow: ACGCCTTCAACAACAGCATT<br>Rev: TCAGGAGGAGGATTCGGAAC    | 58                                |
| GAPDH                        | Fow: TCCACTGGCGTCTTCACC<br>Rev: GGCAGAGATGATGACCCTTT      | 60                                |
